# Supplementary material
Source: ML conference proceedings conference paper supplement (https://openreview.net/forum?id=YsApEEwyiM)
Supplement: supplementary_material [file emg7.xlsx]

## Sheet: Sheet1
115.695	0.23139	46	63.4251	90.1016	85.9375	89.8438	1.56749	0
130.441	0.260882	49	83.058	93.2755	78.125	62.5	1.6935	0
122.864	0.245727	51	57.8439	99.3323	93.75	101.562	1.67948	0
121.046	0.242092	49	44.1204	103.73	97.6562	85.9375	1.80149	0
124.736	0.249471	48	56.3197	102.6	89.8438	85.9375	1.64522	0
108.055	0.216111	48	42.4267	110.036	105.469	105.469	1.5174	0
107.115	0.21423	50	56.2527	106.465	101.562	101.562	1.79763	0
126.273	0.252546	49	57.741	101.725	97.6562	105.469	1.76268	0
123.032	0.246064	47	58.5839	101.817	97.6562	54.6875	1.80377	0
112.083	0.224166	50	59.8576	98.5736	85.9375	85.9375	1.77883	0
119.105	0.238211	52	89.0504	98.1541	85.9375	85.9375	1.6714	0
112.187	0.224375	54	64.6402	98.3618	89.8438	105.469	1.79153	0
114.026	0.228051	54	59.6575	91.3355	78.125	78.125	1.68105	0
122.265	0.244529	50	73.7075	91.5414	82.0312	50.7812	1.72128	0
119.901	0.239803	48	56.3697	99.637	85.9375	85.9375	1.7574	0
123.276	0.246553	47	104.91	96.488	85.9375	85.9375	1.73349	0
121.213	0.242425	48	113.82	93.9247	89.8438	46.875	1.79606	0
109.496	0.218992	51	102.444	97.5418	89.8438	89.8438	1.77109	0
140.62	0.28124	44	109.708	91.1835	89.8438	89.8438	1.70735	0
145.393	0.290786	39	95.3107	88.2788	78.125	89.8438	1.74263	0
111.963	0.223926	41	91.7678	90.589	70.3125	70.3125	1.75165	0
116.419	0.232837	47	95.6287	92.7026	78.125	78.125	1.72722	0
122.794	0.245587	49	112.381	90.8762	82.0312	58.5938	1.68762	0
130.658	0.261316	51	112.053	90.5345	78.125	66.4062	1.74332	0
124.473	0.248947	57	68.9335	94.5032	78.125	66.4062	1.67769	0
130.047	0.260094	48	48.7921	104.541	93.75	97.6562	1.58641	0
128.814	0.257628	44	98.5582	99.4271	89.8438	74.2188	1.75135	0
107.409	0.214817	49	36.8706	97.1943	82.0312	50.7812	1.33549	0
115.405	0.230811	45	108.055	85.0732	74.2188	70.3125	1.69726	0
114.479	0.228959	42	87.8612	90.1651	82.0312	46.875	1.65406	0
143.712	0.287425	42	172.039	84.8758	74.2188	97.6562	1.64665	0
175.885	0.35177	40	195.922	84.1788	78.125	66.4062	1.67991	0
156.32	0.312641	38	171.558	92.3095	85.9375	66.4062	1.72376	0
131.662	0.263324	44	119.928	91.5983	78.125	66.4062	1.73104	0
158.46	0.316919	49	147.295	86.5904	82.0312	93.75	1.70618	0
171.38	0.34276	50	133.005	87.523	82.0312	117.188	1.69308	0
155.921	0.311842	49	116.914	91.5169	74.2188	74.2188	1.6801	0
137.652	0.275305	50	83.3222	94.1997	82.0312	70.3125	1.69968	0
126.323	0.252646	51	62.2179	102.639	89.8438	78.125	1.75686	0
131.149	0.262297	47	109.048	100.646	93.75	109.375	1.70608	0
112.633	0.225265	49	65.498	99.4891	89.8438	132.812	1.80562	0
132.307	0.264613	45	82.3493	97.8624	85.9375	74.2188	1.70824	0
141.918	0.283836	43	111.049	95.5223	85.9375	78.125	1.72286	0
114.981	0.229962	44	89.4666	92.3917	78.125	74.2188	1.71385	0
133.425	0.26685	47	121.818	87.9043	78.125	54.6875	1.71246	0
145.759	0.291518	51	166.583	93.3169	89.8438	89.8438	1.70746	0
121.92	0.243839	53	142.401	103.113	101.562	85.9375	1.74572	0
118.312	0.236625	50	109.734	95.6402	85.9375	66.4062	1.74701	0
130.333	0.260665	44	137.367	85.8538	78.125	66.4062	1.71372	0
146.937	0.293875	42	146.083	89.1437	78.125	66.4062	1.69627	0
127.844	0.255689	49	119.122	98.7495	97.6562	109.375	1.70173	0
115.01	0.230021	53	93.4285	102.632	85.9375	66.4062	1.84656	0
122.074	0.244149	48	96.8956	102.249	93.75	93.75	1.68226	0
122.01	0.24402	50	69.6179	106.341	93.75	93.75	1.69757	0
129.594	0.259188	49	84.5997	100.698	89.8438	89.8438	1.75201	0
114.921	0.229843	53	66.9252	98.5261	89.8438	62.5	1.73914	0
104.144	0.208288	49	83.4757	98.2644	85.9375	70.3125	1.72233	0
119.731	0.239462	43	129.008	95.9544	89.8438	89.8438	1.62285	0
138.688	0.277376	46	145.353	96.1301	89.8438	66.4062	1.80933	0
146.729	0.293458	42	143.938	88.7902	85.9375	66.4062	1.77825	0
150.541	0.301082	44	81.3194	86.6693	82.0312	85.9375	1.62165	0
131.964	0.263928	50	99.1587	91.7498	85.9375	70.3125	1.64703	0
113.062	0.226124	54	107.051	97.6279	93.75	93.75	1.79496	0
131.738	0.263476	47	155.342	92.5841	89.8438	74.2188	1.7133	0
147.435	0.29487	41	130.708	92.2147	89.8438	89.8438	1.74954	0
135.646	0.271293	50	163.848	91.3804	85.9375	97.6562	1.72324	0
112.678	0.225357	58	87.2987	90.5929	70.3125	62.5	1.65302	0
106.777	0.213554	50	99.9396	91.6427	78.125	66.4062	1.713	0
106.934	0.213868	45	123.971	88.4746	70.3125	62.5	1.71174	0
98.0655	0.196131	45	130.696	88.2065	70.3125	58.5938	1.56046	0
102.151	0.204302	46	104.552	94.4175	78.125	78.125	1.76461	0
107.705	0.21541	48	63.6627	97.5059	89.8438	74.2188	1.78057	0
113.179	0.226359	46	93.5365	98.2403	97.6562	46.875	1.80217	0
108.862	0.217724	49	100.929	96.0075	85.9375	82.0312	1.70826	0
91.7469	0.183494	54	96.2072	93.0567	82.0312	39.0625	1.68162	0
89.9903	0.179981	49	103.678	86.7525	85.9375	35.1562	1.68505	0
99.034	0.198068	41	137.83	82.4967	66.4062	66.4062	1.64462	0
104.026	0.208052	39	170.95	82.5262	70.3125	54.6875	1.62714	0
105.183	0.210365	41	136.669	85.5496	82.0312	85.9375	1.72346	0
128.292	0.256584	38	138.734	88.4076	82.0312	70.3125	1.64939	0
139.538	0.279077	41	163.615	84.4889	74.2188	89.8438	1.56643	0
138.429	0.276859	42	136.207	80.0579	74.2188	54.6875	1.64058	0
129.426	0.258852	39	162.698	88.6987	82.0312	46.875	1.67235	0
122.393	0.244785	49	192.697	86.7438	82.0312	82.0312	1.73962	0
115.838	0.231677	50	127.1	88.3119	78.125	62.5	1.61039	0
113.529	0.227057	52	15.2181	121.505	117.188	62.5	1.96229	0
108.866	0.217732	69	8.0211	135.357	125	35.1562	1.814	0
84.0661	0.168132	83	7.72684	143.76	125	50.7812	2.02891	0
89.4854	0.178971	73	14.2056	135.607	128.906	164.062	2.02557	0
99.4743	0.198949	69	9.98037	135.819	125	62.5	1.95367	0
86.7186	0.173437	79	8.87493	152.232	148.438	125	2.01429	0
86.7353	0.173471	71	9.01235	145.502	128.906	109.375	1.96555	0
87.0679	0.174136	63	10.1578	134.98	109.375	74.2188	2.03529	0
75.7564	0.151513	68	13.5964	125.813	105.469	70.3125	1.97795	0
78.4284	0.156857	72	14.0619	138.372	117.188	117.188	1.85298	0
82.3815	0.164763	67	11.3887	140.034	117.188	89.8438	1.94383	0
84.9515	0.169903	63	12.7742	132.08	113.281	54.6875	1.97115	0
80.1961	0.160392	67	13.4505	139.869	132.812	152.344	1.96745	0
79.2484	0.158497	71	11.751	139.472	132.812	74.2188	1.99358	0
75.6637	0.151327	67	11.8654	128.662	109.375	70.3125	1.97562	0
79.9957	0.159991	61	16.4861	117.371	97.6562	35.1562	1.94873	0
96.0811	0.192162	67	21.4284	124.301	109.375	109.375	1.88498	0
90.2537	0.180507	71	13.9268	129.02	109.375	70.3125	1.99306	0
79.6697	0.159339	61	14.8389	125.623	113.281	46.875	1.95038	0
81.4696	0.162939	57	24.711	116.668	109.375	46.875	1.87147	0
84.105	0.16821	58	20.9903	121.205	105.469	82.0312	1.8683	0
78.7179	0.157436	65	15.6195	138.607	132.812	175.781	1.97619	0
83.7212	0.167442	61	20.2223	128.63	128.906	179.688	1.92149	0
94.9974	0.189995	56	23.5815	118.532	105.469	46.875	1.98492	0
91.7377	0.183475	58	21.9767	120.736	105.469	46.875	1.92587	0
93.6091	0.187218	60	17.9479	131.427	121.094	74.2188	1.94273	0
100.799	0.201599	62	16.7981	135.474	128.906	46.875	1.91931	0
97.6243	0.195249	55	22.0706	129.258	128.906	70.3125	1.97639	0
96.1222	0.192244	51	15.3588	120.926	109.375	70.3125	1.86833	0
105.316	0.210633	53	16.9458	117.462	105.469	74.2188	1.8708	0
111.188	0.222377	58	20.4569	120.487	105.469	78.125	1.93872	0
115.345	0.23069	61	19.0484	122.303	113.281	70.3125	1.91708	0
108.756	0.217512	58	18.9662	125.091	128.906	128.906	1.8661	0
107.496	0.214992	56	19.8126	124.039	125	136.719	1.92713	0
107.571	0.215141	61	20.3579	123.675	117.188	175.781	1.95154	0
98.3754	0.196751	60	18.4556	127.559	121.094	179.688	1.9211	0
98.0194	0.196039	56	15.6946	127.222	117.188	136.719	1.96945	0
94.2432	0.188486	60	13.5741	116.831	97.6562	82.0312	1.95378	0
98.3877	0.196775	64	13.2958	119.842	105.469	70.3125	1.84354	0
94.3723	0.188745	72	12.645	132.455	113.281	113.281	1.9741	0
88.2749	0.17655	71	14.6633	132.672	128.906	171.875	1.95998	0
99.0872	0.198174	58	15.7541	123.132	113.281	46.875	1.97378	0
106.55	0.2131	52	17.3258	119.362	93.75	50.7812	1.89649	0
120.239	0.240477	59	18.879	122.221	109.375	89.8438	1.93029	0
113.533	0.227067	65	20.6144	122.964	109.375	66.4062	1.93349	0
90.9198	0.18184	64	12.1737	123.241	109.375	89.8438	1.88124	0
85.8732	0.171746	66	12.4717	124.312	101.562	50.7812	1.96273	0
90.5606	0.181121	69	13.3011	134.733	136.719	70.3125	2.0334	0
98.3957	0.196791	62	21.8013	124.93	117.188	66.4062	1.91948	0
107.813	0.215627	62	24.6334	118.554	113.281	101.562	1.85309	0
116.642	0.233285	64	25.7482	120.984	113.281	113.281	1.76555	0
101.975	0.20395	58	28.2874	120.199	109.375	113.281	1.91499	0
108.607	0.217214	52	22.1172	118.372	105.469	46.875	1.88056	0
125.386	0.250772	56	21.4394	111.335	93.75	46.875	1.92583	0
110.301	0.220603	59	18.9492	116.159	93.75	66.4062	1.79626	0
112.688	0.225376	60	22.2342	126.8	109.375	82.0312	1.93471	0
111.143	0.222285	64	22.7093	127.841	113.281	82.0312	1.91912	0
103.697	0.207395	64	25.5723	120.378	113.281	132.812	1.909	0
102.854	0.205708	67	17.366	126.514	117.188	136.719	1.97858	0
105.276	0.210553	76	10.8683	144.734	136.719	113.281	1.95186	0
114.91	0.229819	68	15.5922	127.608	121.094	50.7812	1.95482	0
105.918	0.211836	54	20.8332	112.948	109.375	50.7812	1.91701	0
92.9162	0.185832	54	18.844	118.124	113.281	39.0625	1.92269	0
100.443	0.200887	57	24.1701	117.776	109.375	109.375	1.93846	0
105.053	0.210106	56	26.7764	120.322	113.281	144.531	1.88797	0
98.1893	0.196379	55	33.3607	121.911	109.375	85.9375	1.92576	0
86.6896	0.173379	64	43.094	123.113	113.281	179.688	1.92073	0
84.8507	0.169701	67	30.6602	124.702	113.281	46.875	1.95229	0
85.1829	0.170366	59	12.4827	126.62	109.375	109.375	1.94844	0
91.3249	0.18265	63	13.3981	127.655	101.562	82.0312	1.89039	0
97.4806	0.194961	59	19.6589	124.544	109.375	97.6562	1.88906	0
91.5307	0.183061	52	29.2793	107.722	93.75	66.4062	1.87237	0
97.2758	0.194552	65	21.1853	122.299	105.469	70.3125	1.93069	0
103.95	0.2079	66	20.2123	124.694	109.375	109.375	1.88086	0
102.722	0.205445	68	16.8043	122.451	101.562	97.6562	1.9175	0
104.044	0.208088	65	17.3309	131.635	128.906	136.719	1.98967	0
100.918	0.201835	56	20.556	129.814	113.281	78.125	1.82614	0
92.9632	0.185926	62	23.4574	130.963	121.094	97.6562	1.82419	0
83.9414	0.167883	72	29.6349	134.104	128.906	105.469	1.83423	0
75.3701	0.15074	71	20.1235	132.934	121.094	152.344	1.89583	0
85.603	0.171206	70	15.8004	137.058	125	74.2188	1.90469	0
91.1589	0.182318	61	15.8934	129.834	117.188	171.875	1.98932	0
85.2013	0.170403	56	16.3529	122.201	113.281	35.1562	1.85401	0
91.4244	0.182849	68	23.873	125.021	113.281	136.719	1.82602	0
100.609	0.201219	66	29.1261	126.688	121.094	132.812	1.92391	0
158.384	0.316768	38	184.034	75.1143	66.4062	39.0625	1.66779	1
164.817	0.329634	38	231.294	74.0365	70.3125	82.0312	1.60717	1
160.053	0.320107	39	188.425	77.3844	70.3125	62.5	1.63342	1
146.9	0.2938	40	218.098	80.0184	66.4062	62.5	1.62216	1
146.413	0.292826	40	257.18	76.3578	70.3125	70.3125	1.60152	1
135.086	0.270172	41	212.411	73.7963	70.3125	70.3125	1.61932	1
151.252	0.302504	42	158.809	74.4468	70.3125	70.3125	1.48033	1
179.908	0.359817	39	165.627	77.5849	70.3125	70.3125	1.51372	1
151.309	0.302617	43	122.587	83.5277	74.2188	46.875	1.58177	1
129.589	0.259178	40	138.198	83.9623	78.125	31.25	1.64964	1
139.115	0.278231	40	300.884	80.2581	74.2188	31.25	1.70712	1
134.991	0.269981	44	268.911	80.0001	74.2188	35.1562	1.65087	1
135.747	0.271494	38	219.15	72.0596	66.4062	35.1562	1.47643	1
133.936	0.267871	38	246.227	76.0103	70.3125	70.3125	1.59743	1
122.535	0.245069	43	162.226	83.7688	74.2188	66.4062	1.67901	1
120.663	0.241327	40	233.904	83.5043	78.125	97.6562	1.66739	1
132.877	0.265755	36	285.105	81.5516	70.3125	66.4062	1.61266	1
129.613	0.259225	40	232.675	82.0615	70.3125	66.4062	1.5755	1
100.934	0.201869	44	155.998	88.0023	78.125	78.125	1.65853	1
111.578	0.223156	44	335.925	81.0889	74.2188	46.875	1.58476	1
112.054	0.224108	38	365.587	78.0264	74.2188	42.9688	1.64778	1
73.6473	0.147295	42	249.156	77.5986	70.3125	70.3125	1.5523	1
83.6702	0.16734	44	227.806	68.5538	54.6875	35.1562	1.50351	1
86.6012	0.173202	39	252.06	73.2248	62.5	39.0625	1.56584	1
80.7771	0.161554	42	183.039	89.7833	85.9375	105.469	1.66088	1
92.2644	0.184529	42	196.33	87.7	85.9375	31.25	1.62951	1
102.557	0.205114	40	244.265	84.7417	74.2188	70.3125	1.59366	1
95.7156	0.191431	44	203.742	77.0414	70.3125	74.2188	1.55222	1
85.6386	0.171277	44	211.354	71.7559	62.5	66.4062	1.50455	1
87.3725	0.174745	43	166.782	84.1335	66.4062	46.875	1.66534	1
91.0097	0.182019	46	227.455	88.5942	74.2188	50.7812	1.7336	1
97.1373	0.194275	46	276.805	80.7972	74.2188	74.2188	1.65696	1
112.633	0.225265	40	341.117	81.8734	74.2188	50.7812	1.59251	1
131.983	0.263966	39	335.166	76.0445	62.5	50.7812	1.58742	1
114.556	0.229111	43	344.289	73.5253	62.5	35.1562	1.64799	1
124.962	0.249924	39	226.737	78.1116	66.4062	42.9688	1.60382	1
145.083	0.290167	37	212.283	77.2236	66.4062	46.875	1.64446	1
134.6	0.269199	37	241.466	83.2847	78.125	85.9375	1.63149	1
121.577	0.243154	36	170.297	84.2684	74.2188	74.2188	1.73415	1
106.788	0.213577	38	197.197	81.6388	74.2188	54.6875	1.67772	1
115.856	0.231712	35	284.648	76.4542	66.4062	66.4062	1.61901	1
138.542	0.277085	36	342.416	77.5852	70.3125	70.3125	1.51161	1
137.104	0.274208	37	309.486	79.9269	70.3125	70.3125	1.59985	1
127.402	0.254804	38	264.125	78.7278	66.4062	66.4062	1.6414	1
124.983	0.249966	45	282.639	77.3421	70.3125	78.125	1.59406	1
119.684	0.239368	41	292.856	78.2784	78.125	39.0625	1.66876	1
124.279	0.248557	38	245.65	83.4667	78.125	66.4062	1.63784	1
127.001	0.254001	40	207.22	87.0839	78.125	82.0312	1.58869	1
122.723	0.245447	40	219.77	88.8252	82.0312	78.125	1.66732	1
122.595	0.24519	43	190.222	82.8597	74.2188	105.469	1.68939	1
109.39	0.21878	47	192.995	81.826	70.3125	46.875	1.64222	1
97.6713	0.195343	45	198.372	85.6874	78.125	117.188	1.76951	1
117.423	0.234846	42	242.233	90.5233	89.8438	31.25	1.71351	1
120.806	0.241613	45	342.633	84.5389	82.0312	93.75	1.61899	1
110.364	0.220729	47	247.477	76.7509	62.5	46.875	1.56605	1
125.405	0.25081	42	208.922	72.8652	62.5	62.5	1.60697	1
153.318	0.306637	37	325.563	73.476	62.5	62.5	1.5417	1
139.236	0.278472	37	202.361	76.0336	66.4062	62.5	1.48739	1
118.325	0.236651	36	164.052	76.3795	62.5	39.0625	1.64857	1
121.95	0.243899	34	137.386	75.6889	66.4062	54.6875	1.57981	1
135.895	0.27179	34	204.224	79.0081	66.4062	66.4062	1.53221	1
144.258	0.288516	36	297.064	80.1192	66.4062	66.4062	1.54932	1
136.809	0.273618	36	90.1062	81.2762	74.2188	93.75	1.42068	1
144.835	0.28967	37	268.43	79.4321	70.3125	70.3125	1.51082	1
131.184	0.262369	43	71.5964	82.1474	74.2188	74.2188	1.24451	1
115.577	0.231155	40	186.17	71.8628	62.5	74.2188	1.40549	1
128.441	0.256882	39	161.676	71.5867	62.5	74.2188	1.48304	1
146.812	0.293624	39	384.871	70.8329	70.3125	70.3125	1.5322	1
163.89	0.327781	33	434.814	69.4907	66.4062	66.4062	1.42184	1
145.356	0.290711	42	467.153	70.7937	70.3125	70.3125	1.42506	1
121.883	0.243767	47	290.43	79.1372	70.3125	66.4062	1.62601	1
138.661	0.277322	36	223.899	75.0551	66.4062	66.4062	1.58965	1
143.681	0.287362	33	225.754	76.5013	70.3125	70.3125	1.53335	1
135.003	0.270007	33	215.497	73.0174	62.5	54.6875	1.35523	1
126.395	0.25279	33	147.233	71.2048	62.5	39.0625	1.3848	1
134.018	0.268035	38	304.818	73.6103	70.3125	58.5938	1.47398	1
138.843	0.277685	35	279.237	73.532	66.4062	70.3125	1.59661	1
144.634	0.289268	36	261.422	76.584	70.3125	62.5	1.585	1
137.578	0.275156	38	449.792	75.96	74.2188	74.2188	1.58968	1
109.251	0.218502	37	147.545	80.175	70.3125	70.3125	1.43473	1
118.196	0.236391	34	263.518	78.8925	66.4062	42.9688	1.55558	1
130.406	0.260813	33	308.581	77.4759	70.3125	58.5938	1.54273	1
107.978	0.215956	33	80.2646	81.3235	62.5	62.5	1.46921	1
104.675	0.209351	33	390.042	74.799	62.5	62.5	1.53801	1
106.415	0.212829	43	76.7206	85.8569	74.2188	58.5938	1.20204	1
124.374	0.248748	50	40.9029	98.7402	97.6562	101.562	1.83059	1
158.058	0.316117	44	43.7867	99.2382	85.9375	46.875	1.84654	1
164.045	0.328091	45	67.1897	100.909	85.9375	54.6875	1.83125	1
158.126	0.316252	48	52.6629	97.3069	82.0312	54.6875	1.7963	1
156.619	0.313237	51	48.732	96.4309	82.0312	50.7812	1.82379	1
166.407	0.332815	55	24.0693	104.058	89.8438	46.875	1.75091	1
162.713	0.325426	47	40.3099	98.181	78.125	46.875	1.8432	1
158.919	0.317837	42	87.5664	97.419	74.2188	50.7812	1.76713	1
144.39	0.28878	49	68.4315	101.838	82.0312	66.4062	1.8196	1
127.697	0.255394	53	45.2567	103.752	85.9375	66.4062	1.82168	1
106.561	0.213122	53	31.6111	105.709	82.0312	70.3125	1.86525	1
122.977	0.245954	51	41.3799	99.8563	82.0312	54.6875	1.7526	1
128.867	0.257734	44	54.0972	95.5153	78.125	54.6875	1.77879	1
129.18	0.258361	50	61.3653	97.082	89.8438	58.5938	1.70922	1
154.282	0.308564	53	103.584	101.006	93.75	54.6875	1.76581	1
151.87	0.30374	48	69.9391	102.457	89.8438	74.2188	1.85012	1
143.113	0.286227	50	29.3665	110.464	93.75	74.2188	1.8883	1
156.354	0.312708	52	27.0366	114.631	97.6562	85.9375	1.74353	1
157.43	0.31486	48	33.2207	110.601	89.8438	85.9375	1.8264	1
126.013	0.252027	52	46.902	105.778	82.0312	66.4062	1.88253	1
131.223	0.262447	51	50.7313	99.482	89.8438	39.0625	1.7093	1
158.899	0.317799	44	50.2267	96.8416	89.8438	46.875	1.76983	1
160.331	0.320663	43	75.0096	93.2988	78.125	46.875	1.77414	1
159.639	0.319279	43	57.1805	94.7414	82.0312	89.8438	1.71945	1
169.467	0.338934	43	89.1378	99.4257	89.8438	89.8438	1.78096	1
173.165	0.346329	42	98.1901	94.6213	85.9375	62.5	1.79558	1
172.906	0.345811	41	59.2522	89.1807	74.2188	50.7812	1.75159	1
149.51	0.299019	47	58.6959	90.7309	74.2188	46.875	1.76596	1
132.955	0.265909	48	72.4065	88.133	74.2188	46.875	1.69985	1
143.757	0.287514	45	105.905	91.0812	78.125	46.875	1.68339	1
142.615	0.285229	47	72.3915	97.7226	82.0312	82.0312	1.80847	1
132.27	0.264541	55	51.4813	99.5196	85.9375	82.0312	1.79728	1
134.98	0.269961	51	80.7499	91.1876	74.2188	66.4062	1.75721	1
124.691	0.249381	40	95.4704	89.8591	74.2188	50.7812	1.76478	1
110.834	0.221668	38	94.3109	96.376	85.9375	85.9375	1.80137	1
120.649	0.241298	40	81.4	99.6215	85.9375	58.5938	1.79199	1
139.144	0.278288	42	124.748	89.9379	70.3125	62.5	1.75038	1
146.088	0.292175	45	106.852	87.1245	70.3125	62.5	1.6833	1
144.519	0.289037	45	96.0578	91.4801	70.3125	66.4062	1.66537	1
135.107	0.270214	43	78.0142	91.4921	74.2188	66.4062	1.65826	1
130.77	0.26154	46	128.268	88.6752	82.0312	93.75	1.75727	1
147.408	0.294815	47	87.0629	92.2963	89.8438	50.7812	1.58563	1
145.239	0.290479	51	104.701	90.356	82.0312	46.875	1.78921	1
126.943	0.253886	50	51.0635	95.5052	85.9375	42.9688	1.79928	1
152.471	0.304941	45	54.2992	110.775	101.562	101.562	1.81939	1
163.335	0.326671	50	41.3491	113.456	101.562	89.8438	1.8255	1
152.884	0.305767	49	36.3852	104.443	93.75	70.3125	1.88463	1
139.309	0.278619	44	49.8114	95.8962	85.9375	93.75	1.7785	1
134.815	0.26963	46	34.9996	103.037	101.562	50.7812	1.84606	1
156.428	0.312856	50	47.7734	111.01	113.281	113.281	1.88484	1
187.258	0.374515	48	53.7033	108.697	105.469	50.7812	1.87099	1
211.59	0.42318	51	33.7992	112.644	97.6562	54.6875	1.8769	1
184.376	0.368751	58	25.3053	112.777	105.469	50.7812	1.71278	1
175.398	0.350796	56	33.4061	98.3088	74.2188	50.7812	1.81317	1
186.474	0.372948	53	25.6394	103.574	82.0312	54.6875	1.84834	1
186.917	0.373834	54	25.9782	107.138	89.8438	97.6562	1.88202	1
185.229	0.370457	48	47.3243	106.854	93.75	93.75	1.9246	1
213.642	0.427283	47	50.2445	102.093	89.8438	82.0312	1.79587	1
215.814	0.431629	48	64.0219	100.933	85.9375	78.125	1.69059	1
167.075	0.33415	46	36.7104	106.324	93.75	74.2188	1.85522	1
155.632	0.311264	43	26.0257	104.087	93.75	78.125	1.88874	1
166.013	0.332026	44	30.5425	92.1221	74.2188	78.125	1.66859	1
158.833	0.317666	40	41.2114	98.3948	82.0312	46.875	1.6577	1
151.217	0.302434	38	65.0221	99.251	89.8438	46.875	1.88113	1
135.445	0.27089	44	145.914	85.0391	78.125	50.7812	1.70197	1
113.26	0.22652	46	113.817	84.5318	74.2188	50.7812	1.64135	1
113.543	0.227086	37	134.624	89.9759	78.125	78.125	1.73714	1
121.578	0.243156	33	111.833	97.9557	85.9375	78.125	1.78495	1
124.55	0.2491	37	122.728	96.653	78.125	50.7812	1.78187	1
107.671	0.215342	39	128.944	98.5642	78.125	54.6875	1.80383	1
109.328	0.218657	38	156.232	92.2737	70.3125	66.4062	1.77923	1
136.535	0.27307	34	134.084	82.3085	66.4062	46.875	1.53952	1
118.248	0.236496	39	131.43	81.1393	70.3125	46.875	1.61215	1
107.474	0.214947	40	128.016	76.3647	54.6875	54.6875	1.59438	1
116.516	0.233033	35	84.7787	81.3776	58.5938	54.6875	1.67273	1
112.608	0.225217	40	84.6863	95.4685	93.75	97.6562	1.75054	1
127.816	0.255632	41	101.695	88.9846	74.2188	46.875	1.69575	1
126.434	0.252868	40	78.3429	83.5931	78.125	46.875	1.58882	1
139.894	0.279787	38	316.355	85.05	74.2188	46.875	1.72725	1
136.919	0.273838	48	61.4036	93.6263	82.0312	50.7812	1.44338	1
109.755	0.219511	55	58.5032	93.8157	78.125	66.4062	1.78464	1
125.793	0.251585	44	113.387	81.7022	66.4062	46.875	1.47079	1
120.869	0.241738	39	155.204	80.4317	66.4062	54.6875	1.59016	1
115.2	0.230399	37	86.0402	97.0216	89.8438	50.7812	1.742	1
145.031	0.290061	37	157.588	92.9155	74.2188	39.0625	1.80888	1
188.348	0.376697	32	1856.73	62.2306	54.6875	46.875	1.23447	2
236.283	0.472567	30	1256.45	63.2507	58.5938	50.7812	1.34435	2
164.683	0.329365	29	908.94	61.2397	58.5938	74.2188	1.36683	2
163.83	0.327661	28	561.665	63.1452	50.7812	27.3438	1.37561	2
210.558	0.421116	29	942.953	64.6089	50.7812	46.875	1.44455	2
171.601	0.343201	32	1744.71	60.4516	50.7812	46.875	1.44331	2
159.29	0.31858	34	822.255	58.7567	50.7812	50.7812	1.2205	2
205.824	0.411647	29	2703.9	55.8594	50.7812	31.25	1.33303	2
136.964	0.273928	27	918.665	55.9526	46.875	42.9688	1.0662	2
141.347	0.282694	25	623.407	63.1429	54.6875	54.6875	1.37783	2
202.94	0.405879	30	571.737	67.563	62.5	42.9688	1.53519	2
181.275	0.362549	36	612.865	74.4464	70.3125	70.3125	1.41388	2
188.462	0.376924	31	470.326	62.4879	58.5938	39.0625	1.35963	2
177.115	0.35423	30	445.088	58.5192	50.7812	39.0625	1.19337	2
171.576	0.343152	29	846.927	63.6618	54.6875	50.7812	1.44352	2
175.486	0.350972	29	266.002	66.7811	62.5	39.0625	1.36196	2
203.235	0.406469	33	1892.64	64.4903	62.5	50.7812	1.36809	2
197.204	0.394408	31	402.82	64.1255	62.5	50.7812	1.2972	2
188.009	0.376018	30	768.842	68.744	66.4062	66.4062	1.47694	2
200.288	0.400576	35	367.966	71.9019	66.4062	66.4062	1.38775	2
181.1	0.362201	33	491.044	66.2741	66.4062	70.3125	1.38244	2
212.192	0.424384	27	612.545	60.806	54.6875	54.6875	1.30451	2
212.517	0.425035	22	982.666	53.7544	50.7812	50.7812	1.01573	2
194.451	0.388901	23	873.193	54.8329	46.875	35.1562	1.17459	2
202.094	0.404188	30	1943.53	59.7936	50.7812	39.0625	1.42462	2
226.134	0.452267	28	499.024	56.0954	42.9688	39.0625	1.16316	2
204.695	0.409389	29	1210.24	59.1565	50.7812	31.25	1.26168	2
140.327	0.280653	37	248.475	73.3289	74.2188	31.25	1.41086	2
178.854	0.357709	33	1032.79	61.4559	54.6875	31.25	1.36077	2
195.646	0.391292	30	199.212	63.127	54.6875	54.6875	1.1608	2
155.571	0.311142	33	1046.2	56.263	42.9688	42.9688	1.06085	2
170.166	0.340331	29	103.72	58.2239	46.875	35.1562	0.932814	2
187.485	0.374971	24	565.118	52.7095	42.9688	31.25	1.10447	2
159.163	0.318327	27	402.818	57.2912	46.875	27.3438	1.30642	2
162.241	0.324483	32	454.972	64.7812	58.5938	54.6875	1.26921	2
190.389	0.380778	31	758.35	63.9249	58.5938	42.9688	1.35737	2
173.456	0.346912	27	806.215	62.5602	50.7812	42.9688	1.37051	2
160.828	0.321656	29	110.287	63.3818	54.6875	42.9688	1.13186	2
214.893	0.429786	30	1327	56.1044	50.7812	39.0625	1.27438	2
212.529	0.425059	30	237.955	58.5658	54.6875	66.4062	1.08554	2
210.04	0.42008	34	1007.78	55.6923	46.875	35.1562	1.29078	2
230.531	0.461062	31	1796.84	53.4972	46.875	50.7812	1.27722	2
178.239	0.356479	35	1129.81	55.2558	50.7812	50.7812	1.30511	2
200.225	0.40045	32	2684.5	49.4399	39.0625	35.1562	1.23462	2
212.842	0.425683	26	2282.68	50.0661	39.0625	31.25	1.23512	2
184.865	0.36973	32	1336.53	58.0407	50.7812	27.3438	1.40106	2
195.24	0.39048	37	1471.23	62.9745	62.5	54.6875	1.27911	2
202.545	0.40509	39	1403.98	62.5358	62.5	74.2188	1.34303	2
190.302	0.380604	36	1305.22	58.2822	54.6875	54.6875	1.35496	2
193.443	0.386886	33	224.223	64.2941	62.5	35.1562	1.26307	2
213.483	0.426966	30	1199.91	56.474	50.7812	42.9688	1.21199	2
263.759	0.527518	24	353.404	49.7796	46.875	46.875	0.986853	2
230.733	0.461467	24	1299.46	46.8655	46.875	46.875	0.873886	2
174.183	0.348366	26	2031.47	53.2382	46.875	46.875	1.31982	2
196.73	0.39346	29	1122.1	56.6309	54.6875	31.25	1.0038	2
160.562	0.321123	36	999.622	56.5454	54.6875	58.5938	1.31665	2
171.611	0.343221	32	795.588	55.6814	50.7812	42.9688	1.2262	2
230.733	0.461466	30	1060.42	57.3771	50.7812	50.7812	1.33594	2
228.233	0.456466	29	1223.07	59.5391	50.7812	50.7812	1.17864	2
224.736	0.449473	23	1361.79	53.2805	50.7812	31.25	1.13282	2
213.78	0.427559	28	1727.21	50.516	42.9688	27.3438	1.27248	2
195.196	0.390393	26	542.654	51.7323	46.875	46.875	0.881823	2
228.85	0.4577	26	611.752	54.5165	50.7812	31.25	1.30412	2
241.249	0.482497	32	574.654	56.6528	50.7812	74.2188	1.1824	2
198.561	0.397121	30	295.241	58.0407	54.6875	74.2188	1.22298	2
191.89	0.38378	27	453.334	57.6029	54.6875	54.6875	1.22626	2
232.301	0.464601	27	1342.87	54.0951	54.6875	31.25	1.24727	2
242.811	0.485623	24	1160.44	49.9629	42.9688	31.25	1.07862	2
212.729	0.425458	21	1119.83	48.1551	39.0625	39.0625	1.06828	2
208.524	0.417047	25	825.616	50.5641	46.875	31.25	0.979082	2
254.97	0.509941	26	2578.84	49.8674	50.7812	50.7812	1.13944	2
280.386	0.560772	20	856.244	47.8627	46.875	50.7812	1.00639	2
243.819	0.487638	22	818.519	47.2704	35.1562	54.6875	0.98255	2
229.634	0.459268	25	1436.53	50.0396	50.7812	31.25	1.14124	2
220.773	0.441545	27	685.21	49.3989	46.875	27.3438	0.669902	2
185.907	0.371814	33	1381.35	53.1241	46.875	46.875	1.21798	2
186.813	0.373627	29	440.715	52.573	42.9688	35.1562	1.16745	2
207.286	0.414572	22	422.68	50.383	46.875	66.4062	1.09292	2
227.204	0.454408	21	666.349	50.701	42.9688	42.9688	0.961116	2
242.953	0.485906	24	637.601	48.5387	42.9688	42.9688	1.02451	2
243.451	0.486903	26	1564.08	47.7284	46.875	46.875	1.15365	2
241.317	0.482634	25	207.564	51.4758	50.7812	54.6875	0.860498	2
249.617	0.499234	23	4047.98	47.4831	42.9688	54.6875	1.07727	2
223.234	0.446468	25	190.295	51.652	46.875	31.25	0.82218	2
216.866	0.433732	24	391.453	50.7202	46.875	23.4375	0.897265	2
272.881	0.545762	24	200.279	59.4779	46.875	35.1562	1.41708	2
274.507	0.549015	27	150.271	64.1507	54.6875	39.0625	1.35836	2
267.436	0.534872	32	130.11	62.3378	54.6875	46.875	1.28502	2
325.002	0.650004	33	231.929	60.7663	46.875	46.875	1.35509	2
307.594	0.615187	32	195.365	62.5837	46.875	39.0625	1.19044	2
205.81	0.411621	32	116.428	67.8442	54.6875	46.875	1.45995	2
217.169	0.434338	32	91.2394	64.3988	54.6875	27.3438	1.15979	2
224.344	0.448688	32	129.589	59.3832	46.875	35.1562	1.23021	2
186.091	0.372182	34	109.88	64.3027	62.5	35.1562	1.2974	2
199.838	0.399676	40	285.686	70.7134	62.5	62.5	1.51193	2
224.554	0.449108	35	370.7	66.3558	50.7812	46.875	1.3627	2
217.164	0.434327	25	290.481	64.0359	54.6875	42.9688	1.42281	2
222.984	0.445967	27	206.635	69.5128	54.6875	54.6875	1.34215	2
271.035	0.542071	26	128.081	66.3779	54.6875	74.2188	1.27981	2
293.174	0.586348	27	447.16	57.4279	46.875	54.6875	1.17041	2
268.89	0.537779	32	226.1	60.9968	50.7812	31.25	1.22899	2
239.131	0.478263	32	250.812	63.4836	50.7812	35.1562	1.375	2
232.978	0.465955	36	125.4	65.4644	50.7812	31.25	1.32315	2
237.516	0.475032	41	142.961	68.6172	58.5938	70.3125	1.45291	2
263.458	0.526915	40	150.715	68.3406	58.5938	58.5938	1.4906	2
297.968	0.595936	35	157.997	63.2592	46.875	42.9688	1.36119	2
326.283	0.652566	30	144.906	58.0071	42.9688	42.9688	1.25371	2
331.724	0.663448	29	119.583	57.5436	42.9688	42.9688	1.31156	2
400.275	0.80055	27	140.12	50.8856	39.0625	35.1562	1.13548	2
457.313	0.914625	30	131.692	55.9186	42.9688	35.1562	1.07997	2
472.325	0.94465	32	111.407	61.7063	39.0625	39.0625	1.29277	2
436.669	0.873338	29	140.559	60.4756	50.7812	35.1562	1.44535	2
354.93	0.70986	36	63.2875	73.2239	58.5938	31.25	1.34501	2
381.378	0.762756	32	75.4059	63.5311	39.0625	31.25	1.36332	2
338.336	0.676672	32	77.2788	61.5691	39.0625	31.25	1.23724	2
291.403	0.582806	35	146.153	67.5218	62.5	62.5	1.4559	2
259.692	0.519383	27	180.259	63.0594	62.5	35.1562	1.47747	2
286.02	0.57204	25	240.27	60.1279	42.9688	42.9688	1.45132	2
313.799	0.627598	30	335.086	65.216	58.5938	27.3438	1.40425	2
324.918	0.649835	30	581.887	61.4709	54.6875	35.1562	1.24436	2
317.188	0.634377	25	358.601	58.9014	50.7812	39.0625	1.30903	2
223.439	0.446878	35	276.865	63.1293	54.6875	39.0625	1.34191	2
233.198	0.466396	38	257.415	63.0652	54.6875	39.0625	1.28575	2
193.73	0.38746	32	466.087	58.7019	46.875	39.0625	1.36931	2
192.524	0.385048	29	242.842	55.937	50.7812	50.7812	1.15756	2
242.843	0.485685	27	279.416	58.9607	50.7812	39.0625	1.23905	2
226.794	0.453588	27	556.247	59.1487	42.9688	42.9688	1.32828	2
245.424	0.490847	28	344.806	68.1548	62.5	35.1562	1.4323	2
212.128	0.424256	33	428.043	75.2234	66.4062	66.4062	1.62319	2
202.496	0.404992	33	104.953	68.6925	50.7812	39.0625	1.30106	2
264.803	0.529607	31	419.366	61.2612	50.7812	50.7812	1.38289	2
211.153	0.422305	30	72.0336	64.019	54.6875	58.5938	1.12848	2
201.44	0.402881	31	285.475	63.2016	50.7812	50.7812	1.46255	2
237.897	0.475793	32	268.508	62.9261	50.7812	46.875	1.29692	2
223.793	0.447585	33	407.701	62.3579	54.6875	39.0625	1.41678	2
226.291	0.452581	32	229.866	62.9159	50.7812	46.875	1.31736	2
203.368	0.406736	33	308.727	66.9575	62.5	62.5	1.53039	2
244.275	0.48855	30	350.47	63.3524	54.6875	54.6875	1.32646	2
288.388	0.576776	27	458.828	58.8215	50.7812	35.1562	1.39701	2
260.516	0.521032	30	232.334	57.3775	50.7812	46.875	1.0754	2
230.971	0.461941	26	178.628	59.3635	46.875	27.3438	1.45686	2
208.018	0.416036	28	156.968	64.3205	54.6875	31.25	1.48643	2
215.064	0.430128	33	370.038	66.6788	62.5	62.5	1.42297	2
206.526	0.413052	30	445.698	64.8649	50.7812	42.9688	1.58378	2
213.087	0.426174	26	263.279	59.0954	39.0625	31.25	1.09086	2
242.701	0.485402	30	548.012	60.3543	54.6875	31.25	1.42245	2
209.406	0.418812	34	316.714	61.9262	58.5938	54.6875	1.39883	2
195.309	0.390618	33	109.152	68.7134	54.6875	39.0625	1.29433	2
233.2	0.4664	33	169.127	62.808	46.875	42.9688	1.24914	2
236.343	0.472687	33	141.778	61.7985	42.9688	42.9688	1.18934	2
238.976	0.477953	28	317.08	58.0464	42.9688	31.25	1.37394	2
266.525	0.53305	24	159.045	58.6972	50.7812	27.3438	1.07863	2
244.907	0.489814	24	475.381	55.2075	46.875	31.25	1.26374	2
192.766	0.385532	28	124.232	60.3202	54.6875	54.6875	1.03811	2
173.833	0.347666	32	316.598	62.9609	50.7812	50.7812	1.20822	2
173.396	0.346792	35	308.088	63.0515	54.6875	50.7812	1.5136	2
210.454	0.420908	29	369.908	56.8798	42.9688	35.1562	1.23303	2
229.651	0.459303	26	428.923	56.4113	50.7812	31.25	1.38543	2
188.203	0.376407	33	387.879	61.0484	54.6875	39.0625	1.27061	2
215.912	0.431825	29	942.424	55.7178	46.875	46.875	1.33287	2
268.176	0.536352	24	617.279	56.9526	54.6875	58.5938	0.944752	2
212.42	0.424841	30	316.558	60.9239	58.5938	66.4062	1.3424	2
189.921	0.379843	33	171.629	57.7831	58.5938	27.3438	1.18434	2
257.465	0.51493	29	379.42	50.9416	46.875	31.25	1.12669	2
232.965	0.465931	27	757.606	48.6686	46.875	46.875	1.18658	2
195.786	0.391573	28	320.42	56.3216	46.875	42.9688	1.15732	2
224.675	0.44935	30	518.371	59.5822	50.7812	66.4062	1.4089	2
178.298	0.356596	31	481.265	60.6146	50.7812	39.0625	1.3251	2
170.898	0.341796	31	463.181	59.282	50.7812	39.0625	1.08661	2
246.689	0.493378	26	456.96	51.0002	39.0625	39.0625	1.24668	2
